# Supplementary material for: Towards Standardization of Quantitative Retinal Vascular Parameters: Comparison of SIVA and VAMPIRE Measurements in the Lothian Birth Cohort 1936
Source: PubMed Central journal article supplement (PMC5868859; doi:10.1167/tvst.7.2.12), 2018-03-23
Supplement: tvst-07-02-05_sf02.pdf [file tvst-07-02-05_sf02.pdf]

Supplementary Figure S2.

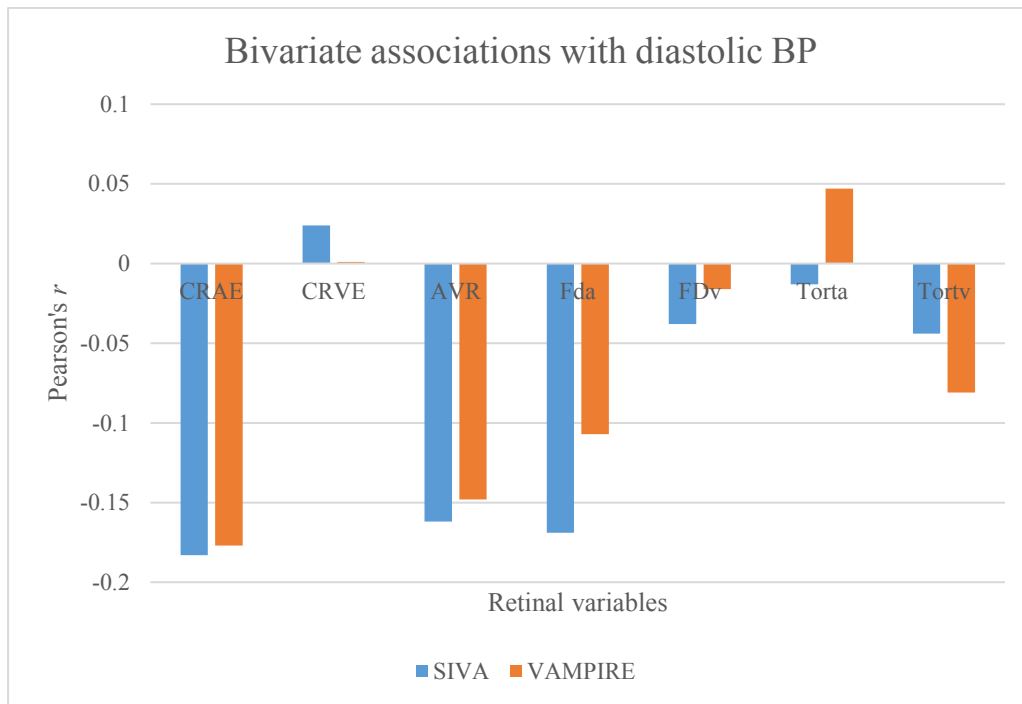

Supplementary Figure S1 illustrating intersoftware agreement in retinal-diastolic blood pressure correlation magnitudes.

*Note.* Associations significant at absolute  $r > .078$
